# Supplementary material
Source: PubMed Central journal article supplement (PMC470766)
Supplement: pnas_101_26_9873__1.pdf [file pnas_101_26_9873__1.pdf]

**Table 1. Changes of gene expression in *hos9-1*, genes with higher expression in *hos9-1* by 3-fold**

| AGI ID    | Gene Title                                                    | <i>hos9-1</i> _vs_C24_0C-24H_Signal Log Ratio | C24-0C-24H_Signal | C24-0C-24H_Detection | <i>hos9-1</i> _0C-24H_Signal | <i>hos9-1</i> _0C-24H_Detection |
|-----------|---------------------------------------------------------------|-----------------------------------------------|-------------------|----------------------|------------------------------|---------------------------------|
| At3g09870 | auxin-induced (indole-3-acetic acid induced) protein family   | 5.6                                           | 2.7               | A                    | 130.2                        | P                               |
| At2g37430 | C2H2-type zinc finger protein -related                        | 4.7                                           | 11.1              | A                    | 280.4                        | P                               |
| At3g13370 | hypothetical protein                                          | 4.7                                           | 1.1               | A                    | 35.5                         | P                               |
| At3g21080 | expressed protein                                             | 4.7                                           | 8.8               | A                    | 342.4                        | P                               |
| At3g12910 | expressed protein                                             | 4.1                                           | 9.2               | A                    | 148.6                        | P                               |
|           | AFFX-Athal-25SrRNA_s_at                                       | 3.9                                           | 145.3             | P                    | 4123                         | P                               |
| At2g32030 | GCN5-related N-acetyltransferase (GNAT) family                | 3.7                                           | 104               | P                    | 1401                         | P                               |
| At5g51190 | AP2 domain transcription factor, putative                     | 3.5                                           | 89.7              | P                    | 899.4                        | P                               |
| At1g05575 | expressed protein                                             | 3.3                                           | 142.7             | A                    | 934.1                        | P                               |
| At5g46295 | expressed protein                                             | 3.3                                           | 35.5              | A                    | 197.2                        | P                               |
| At1g35210 | expressed protein                                             | 3.3                                           | 76                | P                    | 1333                         | P                               |
| At1g30040 | gibberellin 2-oxidase (GA2-oxidase) ( <i>ga2ox2</i> )         | 3.2                                           | 86.9              | A                    | 929.3                        | P                               |
| At3g28620 | zinc finger (RING finger) protein family                      | 3.2                                           | 22.7              | A                    | 161.9                        | P                               |
| At3g55840 | nematode resistance protein-related protein                   | 3.1                                           | 242.3             | P                    | 2236                         | P                               |
| At5g52760 | heavy-metal-associated domain-containing protein              | 3                                             | 313.7             | P                    | 2518                         | P                               |
| At5g57220 | cytochrome P450, putative                                     | 2.9                                           | 150.7             | P                    | 1488                         | P                               |
| At4g30430 | senescence-associated protein family                          | 2.8                                           | 102.5             | A                    | 721.5                        | P                               |
| At4g37290 | expressed protein                                             | 2.8                                           | 30.8              | A                    | 262                          | P                               |
| At1g27820 | hypothetical protein                                          | 2.8                                           | 32.3              | A                    | 337.6                        | P                               |
| At1g15010 | expressed protein                                             | 2.7                                           | 242.4             | P                    | 1692                         | P                               |
| At4g24570 | mitochondrial carrier protein family                          | 2.7                                           | 631.6             | P                    | 4458                         | P                               |
| At3g55980 | expressed protein                                             | 2.7                                           | 569.8             | P                    | 3894                         | P                               |
| At5g54490 | calcium-binding protein, putative                             | 2.7                                           | 585               | P                    | 4120                         | P                               |
| At5g64870 | nodulin-related                                               | 2.7                                           | 161.1             | P                    | 993.2                        | P                               |
| At2g46400 | WRKY family transcription factor                              | 2.6                                           | 892.4             | P                    | 4361                         | P                               |
| At3g23250 | myb family transcription factor(MYB15)                        | 2.6                                           | 35.8              | A                    | 236.1                        | P                               |
| At5g22380 | No apical meristem (NAM) protein family                       | 2.6                                           | 214               | P                    | 1254                         | P                               |
| At4g17490 | ethylene responsive element binding factor (ERF6)             | 2.6                                           | 65.2              | A                    | 461.7                        | P                               |
| At1g28370 | ethylene responsive element binding factor 11, EREBP11/ERF11) | 2.5                                           | 365.6             | P                    | 2024                         | P                               |
| At3g01830 | calmodulin-related protein, putative                          | 2.5                                           | 129               | P                    | 795.5                        | P                               |
| At3g28600 | AAA-type ATPase family                                        | 2.5                                           | 26.5              | A                    | 156.7                        | P                               |
| At1g61340 | F-box protein family                                          | 2.4                                           | 363.3             | A                    | 2327                         | P                               |
| At3g43250 | hypothetical protein                                          | 2.4                                           | 43                | M                    | 270.6                        | P                               |
| At5g26920 | calmodulin-binding protein                                    | 2.4                                           | 1241.8            | P                    | 6901                         | P                               |
| At1g57990 | purine permease-related                                       | 2.4                                           | 579.3             | P                    | 3367                         | P                               |

|           |                                                        |     |        |   |       |   |
|-----------|--------------------------------------------------------|-----|--------|---|-------|---|
| At2g35710 | glycogenin glucosyltransferase (glycogenin) - related  | 2.3 | 162    | P | 1080  | P |
| At2g20145 | disease resistance protein (TIR class), putative       | 2.3 | 471.8  | P | 2334  | P |
| At1g56060 | hypothetical protein                                   | 2.3 | 749.5  | P | 3804  | P |
| At1g76210 | expressed protein                                      | 2.3 | 28.3   | A | 154.5 | P |
| At3g10930 | expressed protein                                      | 2.3 | 130.8  | P | 611   | P |
| At4g23210 | serine/threonine kinase - like protein                 | 2.3 | 175.1  | P | 952   | P |
| At3g50930 | AAA-type ATPase family                                 | 2.3 | 1016.2 | P | 5180  | P |
| At5g42380 | calmodulin-related protein, putative                   | 2.3 | 468.2  | P | 1878  | P |
| At5g45630 | hypothetical protein                                   | 2.3 | 108.5  | P | 490.8 | P |
| At1g44130 | nucellin protein, putative                             | 2.3 | 27.7   | A | 151.4 | P |
| At2g35715 | expressed protein                                      | 2.2 | 70.9   | A | 320.5 | P |
| At2g17040 | No apical meristem (NAM) protein family                | 2.2 | 20.5   | A | 229.9 | P |
| At3g22910 | calcium-transporting ATPase (calcium pump), putative   | 2.2 | 1152.9 | P | 5720  | P |
| At1g24140 | metallo proteinase -related                            | 2.1 | 173.5  | P | 748.4 | P |
| At1g78410 | expressed protein                                      | 2.1 | 157.3  | P | 613.6 | P |
| At1g19380 | expressed protein                                      | 2.1 | 238.5  | P | 1192  | P |
| At1g68840 | AP2 domain protein RAP2.8 (RAV2)                       | 2.1 | 621.9  | P | 2877  | P |
| At1g13340 | expressed protein                                      | 2.1 | 684.6  | P | 2338  | P |
| At3g17690 | cyclic nucleotide-binding transporter 2 (CNBT2/CNGC19) | 2.1 | 28.2   | A | 119.3 | P |
| At1g66090 | disease resistance protein (TIR-NBS class), putative   | 2.1 | 680.5  | P | 3025  | P |
| At4g12190 | C3HC4-type zinc finger protein family                  | 2.1 | 90.1   | P | 302.1 | P |
| At4g29780 | expressed protein                                      | 2.1 | 518.2  | P | 2530  | P |
| At4g39670 | expressed protein                                      | 2.1 | 900.3  | P | 4212  | P |
| At3g57450 | expressed protein                                      | 2.1 | 524.2  | P | 2622  | P |
| At1g10340 | ankyrin repeat protein family                          | 2   | 632.1  | P | 2223  | P |
| At1g21110 | O-methyltransferase 1, putative                        | 2   | 111.4  | P | 461.7 | P |
| At1g19770 | purine permease-related                                | 2   | 1271.8 | P | 5122  | P |
| At3g16720 | RING zinc finger protein -related                      | 2   | 256.9  | P | 1014  | P |
| At3g28580 | AAA-type ATPase family                                 | 2   | 78     | P | 279.5 | P |
| At1g18570 | myb family transcription factor                        | 2   | 125.4  | A | 415.9 | P |
| At4g38560 | Phospholipase like protein                             | 2   | 38.2   | A | 173.6 | P |
| At3g57950 | hypothetical protein                                   | 2   | 29.4   | A | 122.7 | P |
| At5g01380 | transcription factor GT-3a                             | 2   | 55.3   | A | 222.2 | P |
| At5g39670 | calcium-binding EF-hand family protein                 | 2   | 889.9  | P | 3473  | P |
| At5g52750 | heavy-metal-associated domain-containing protein       | 2   | 668.2  | P | 2412  | P |
| At4g14365 | expressed protein                                      | 2   | 1192   | P | 6091  | P |
| At2g38470 | WRKY family transcription factor                       | 1.9 | 1705.4 | P | 6282  | P |
| At2g30020 | protein phosphatase 2C (PP2C), putative                | 1.9 | 165.5  | P | 587.6 | P |
| At2g02140 | plant defensin protein, putative (PDF2.6)              | 1.9 | 7.7    | A | 43.9  | P |
| At2g02010 | glutamate decarboxylase                                | 1.9 | 254.7  | P | 1103  | P |
| At1g76650 | calcium-binding EF-hand family protein                 | 1.9 | 154.3  | P | 562.4 | P |
| At3g02840 | expressed protein                                      | 1.9 | 164    | P | 788.6 | P |
| At1g30370 | lipase (class 3) family                                | 1.9 | 122.4  | A | 402.2 | P |
| At4g27280 | calcium-binding EF-hand family protein                 | 1.9 | 3174.7 | P | 11729 | P |
| At3g44260 | CCR4-associated factor 1-related protein               | 1.9 | 138.9  | P | 510.5 | P |
| At3g48640 | hypothetical protein                                   | 1.9 | 906.7  | P | 3437  | P |
| At3g50770 | calmodulin-related protein, putative                   | 1.9 | 240.3  | P | 797.4 | P |
| At3g59080 | expressed protein                                      | 1.9 | 177.8  | P | 814   | P |
| At3g61190 | BON1-associated protein 1 (BAP1)                       | 1.9 | 1221.4 | P | 5343  | P |
| At5g01540 | receptor lectin kinase, putative                       | 1.9 | 386    | P | 1232  | P |
| At5g60800 | heavy-metal-associated domain-containing protein       | 1.9 | 119.4  | A | 516.2 | P |

|           |                                                           |     |        |   |       |   |
|-----------|-----------------------------------------------------------|-----|--------|---|-------|---|
| At3g56880 | expressed protein                                         | 1.9 | 2060.1 | P | 7607  | P |
| At1g58420 | expressed protein                                         | 1.9 | 210.7  | P | 850.3 | P |
| At2g45760 | C2 domain-containing protein                              | 1.9 | 145.9  | P | 515.1 | P |
| At2g32140 | disease resistance protein (TIR class), putative          | 1.8 | 73.8   | P | 395.4 | P |
| At2g32190 | expressed protein                                         | 1.8 | 1051.7 | P | 3318  | P |
| At1g72920 | disease resistance protein (TIR-NBS class), putative      | 1.8 | 125.4  | P | 451.6 | P |
| At1g74710 | isochorismate synthase 1 (isochorismate mutase) (ICS1)    | 1.8 | 541.9  | P | 1773  | P |
| At1g72520 | lipoxygenase (LOX), putative                              | 1.8 | 301.6  | P | 1056  | P |
| At1g63750 | disease resistance protein (TIR-NBS-LRR class), putative  | 1.8 | 107.2  | P | 419.2 | P |
| At1g73800 | calmodulin-binding protein                                | 1.8 | 899.8  | P | 3406  | P |
| At1g01560 | mitogen-activated protein kinase (MAPK), putative (MPK11) | 1.8 | 1402   | P | 4621  | P |
| At4g33050 | expressed protein                                         | 1.8 | 689.4  | P | 2484  | P |
| At3g44350 | No apical meristem (NAM) protein family                   | 1.8 | 85     | A | 367.3 | P |
| At3g49530 | No apical meristem (NAM) protein family                   | 1.8 | 780    | P | 2858  | P |
| At5g47230 | ethylene responsive element binding factor 5 (AtERF5)     | 1.8 | 272.1  | P | 801   | P |
| At5g54720 | hypothetical protein                                      | 1.8 | 370    | P | 1150  | P |
| At5g61900 | copine BONZA1 (BON1)                                      | 1.8 | 448.8  | P | 1797  | P |
| At2g41100 | calmodulin-related protein 3, touch-induced (TCH3)        | 1.7 | 4135   | P | 10889 | P |
| At2g25735 | expressed protein                                         | 1.7 | 129.1  | P | 533.8 | P |
| At2g32210 | expressed protein                                         | 1.7 | 2023   | P | 6493  | P |
| At1g16420 | hypothetical protein common family                        | 1.7 | 161.2  | P | 473.7 | P |
| At1g72900 | disease resistance protein (TIR-NBS class), putative      | 1.7 | 371.7  | P | 1186  | P |
| At1g80840 | WRKY family transcription factor                          | 1.7 | 683.5  | P | 2491  | P |
| At1g14370 | protein kinase (APK2a)                                    | 1.7 | 302.4  | P | 1074  | P |
| At1g73805 | calmodulin-binding protein                                | 1.7 | 611.6  | P | 2495  | P |
| At3g28850 | expressed protein                                         | 1.7 | 165.4  | P | 476.9 | P |
| At4g05110 | equilibrative nucleoside transporter ENT6 -related        | 1.7 | 50.6   | A | 141.7 | P |
| At3g52430 | phytoalexin-deficient 4 protein (pad4)                    | 1.7 | 969.9  | P | 3082  | P |
| At5g24110 | WRKY family transcription factor                          | 1.7 | 60.5   | A | 294.7 | P |
| At5g58120 | disease resistance protein (TIR-NBS-LRR class), putative  | 1.7 | 265.7  | P | 909.8 | P |
| At5g66210 | calcium-dependent protein kinase                          | 1.7 | 436.3  | P | 1675  | P |
| At5g14930 | leaf senescence-associated protein (SAG101)               | 1.7 | 158    | P | 532.4 | P |
| At2g41640 | expressed protein                                         | 1.7 | 433.9  | P | 1227  | P |
| At2g39650 | expressed protein                                         | 1.6 | 293.7  | P | 955.8 | P |
| At2g41010 | expressed protein                                         | 1.6 | 247.9  | P | 798.8 | P |
| At2g24800 | peroxidase, putative                                      | 1.6 | 22.1   | A | 72.7  | P |
| At1g19020 | expressed protein                                         | 1.6 | 2219.9 | P | 6688  | P |
| At3g14700 | expressed protein                                         | 1.6 | 19.7   | A | 82.7  | P |
| At3g22930 | calmodulin, putative                                      | 1.6 | 125.3  | P | 413.4 | P |
| At3g28340 | galactinol synthase, putative                             | 1.6 | 829.5  | P | 2880  | P |
| At1g51700 | Dof zinc finger protein                                   | 1.6 | 671.2  | P | 1765  | P |
| At1g20823 | RING zinc finger protein -related                         | 1.6 | 158.6  | P | 503.8 | P |
| At4g12720 | MutT/nudix family protein                                 | 1.6 | 4858   | P | 12878 | P |
| At4g18950 | protein kinase - like protein                             | 1.6 | 396.8  | P | 1145  | P |
| At4g23610 | expressed protein                                         | 1.6 | 84.6   | P | 185.7 | P |
| At4g29740 | cytokinin oxidase family                                  | 1.6 | 190.3  | P | 674.7 | P |
| At3g47540 | glycosyl hydrolase family 19 (chitinase)                  | 1.6 | 838.8  | P | 3223  | P |
| At3g48090 | disease resistance protein (EDS1)                         | 1.6 | 210.1  | P | 743.3 | P |
| At3g52400 | syntaxin of plants SYP122                                 | 1.6 | 1212.9 | P | 3891  | P |
| At3g54150 | embryonic abundant protein -related                       | 1.6 | 249.9  | P | 907.9 | P |
| At3g55150 | exocyst subunit EXO70 family                              | 1.6 | 104.9  | P | 380.1 | P |

|           |                           |     |        |   |       |   |
|-----------|---------------------------|-----|--------|---|-------|---|
| At5g10695 | expressed protein         | 1.6 | 1242.9 | P | 3316  | P |
| At1g73540 | MutT/nudix family protein | 1.6 | 196.2  | P | 819.3 | P |
| At3g02800 | expressed protein         | 1.6 | 135    | P | 207.3 | P |
