# Supplementary material
Source: PubMed Central journal article supplement (PMC470766)
Supplement: pnas_101_26_9873__2.pdf [file pnas_101_26_9873__2.pdf]

**Table 2. Changes of gene expression in *hos9-1*, genes with lower expression in *hos9-1* by 2-fold**

| AGI ID    | Gene Title                                                     | <i>hos9-1</i> vs_C24_0C-24H_Signal Log Ratio | C24-0C-24H_Signal | C24-0C-24H_Detection | <i>hos9-1</i> _0C-24H_Signal | <i>hos9-1</i> _0C-24H_Detection |
|-----------|----------------------------------------------------------------|----------------------------------------------|-------------------|----------------------|------------------------------|---------------------------------|
| At1g75830 | plant defensin protein, putative (PDF1.1)                      | -2.3                                         | 120               | P                    | 29.8                         | A                               |
| At3g28220 | expressed protein                                              | -2.3                                         | 1423.8            | P                    | 320.5                        | P                               |
| At5g44120 | 12S seed storage protein (CRA1)                                | -1.9                                         | 436.1             | P                    | 122.1                        | P                               |
| At3g55970 | oxidoreductase, 2OG-Fe(II) oxygenase family                    | -1.8                                         | 290.7             | P                    | 92.6                         | A                               |
| At1g60590 | polygalacturonase, putative                                    | -1.7                                         | 523.1             | P                    | 146.5                        | P                               |
| At5g44420 | plant defensin protein, putative (PDF1.2a)                     | -1.7                                         | 5058.4            | P                    | 1292.8                       | P                               |
| At5g40420 | oleosin                                                        | -1.6                                         | 195.9             | P                    | 57.8                         | A                               |
| At2g41260 | glycine-rich, late embryogenesis abundant M17 protein          | -1.5                                         | 102.5             | P                    | 39.3                         | A                               |
| At2g21210 | auxin-induced (indole-3-acetic acid induced) protein, putative | -1.5                                         | 475.9             | P                    | 173.6                        | A                               |
| At4g34760 | auxin-induced (indole-3-acetic acid induced) protein family    | -1.5                                         | 201.6             | P                    | 75.1                         | A                               |
| At5g57180 | CIA2 (CIA2)                                                    | -1.5                                         | 900.1             | P                    | 297.2                        | P                               |
| At1g19670 | coronatine-induced protein 1 (COR1)                            | -1.3                                         | 722               | P                    | 318.9                        | P                               |
| At4g38860 | auxin-induced (indole-3-acetic acid induced) protein, putative | -1.3                                         | 228.5             | P                    | 82.8                         | P                               |
| At5g03350 | expressed protein                                              | -1.3                                         | 229.1             | P                    | 77                           | A                               |
| At2g26020 | plant defensin protein, putative (PDF1.2b)                     | -1.3                                         | 14437             | P                    | 5323.6                       | P                               |
| At2g39030 | GCN5-related N-acetyltransferase (GNAT) family                 | -1.2                                         | 1850.3            | P                    | 921.2                        | P                               |
| At2g28200 | zinc-finger protein -related                                   | -1.2                                         | 274.9             | P                    | 107                          | P                               |
| At1g78995 | expressed protein                                              | -1.2                                         | 452.9             | P                    | 164.7                        | A                               |
| At1g19960 | expressed protein                                              | -1.2                                         | 883               | P                    | 362.4                        | P                               |
| At4g26150 | GATA zinc finger protein                                       | -1.2                                         | 1173.2            | P                    | 504.4                        | P                               |
| At1g70700 | expressed protein                                              | -1.1                                         | 1102.4            | P                    | 676.9                        | P                               |
| At4g25990 | CIL protein                                                    | -1.1                                         | 255.8             | P                    | 114.3                        | P                               |
| At4g28520 | 12S seed storage protein (cruciferin), putative                | -1.1                                         | 445.1             | P                    | 132.5                        | P                               |
| At3g49620 | oxidoreductase (din11), putative                               | -1.1                                         | 1752.3            | P                    | 854                          | P                               |
| At5g63530 | copper chaperone (CCH)-related                                 | -1.1                                         | 355.3             | P                    | 151.9                        | P                               |
| At2g38240 | oxidoreductase, 2OG-Fe(II) oxygenase family                    | -1                                           | 602.8             | P                    | 293.8                        | M                               |
| At2g28410 | predicted GPI-anchored protein                                 | -1                                           | 109.4             | P                    | 83.9                         | A                               |
| At1g10640 | polygalacturonase, putative                                    | -1                                           | 183.8             | P                    | 98.3                         | A                               |
| At1g06160 | ethylene response factor, putative                             | -1                                           | 141.2             | P                    | 78.8                         | A                               |
| At1g52400 | glycosyl hydrolase family 1, beta-glucosidase (BG1)            | -1                                           | 3821.8            | P                    | 1705.9                       | P                               |
| At3g03190 | glutathione transferase, putative                              | -1                                           | 239               | P                    | 139.3                        | A                               |
| At3g15095 | hypothetical protein                                           | -1                                           | 341.2             | P                    | 158                          | P                               |
| At1g51780 | auxin conjugate hydrolase/IAA-amino acid hydrolase (ILL5)      | -1                                           | 315.6             | P                    | 180.3                        | P                               |
| At4g12970 | expressed protein                                              | -1                                           | 249.6             | P                    | 119.5                        | A                               |
| At5g05600 | oxidoreductase, 2OG-Fe(II) oxygenase family                    | -1                                           | 1022.4            | P                    | 526.7                        | P                               |
