# Supplementary material
Source: PubMed Central journal article supplement (PMC470766)
Supplement: pnas_101_26_9873__3.pdf [file pnas_101_26_9873__3.pdf]

**Table 3. Changes of gene expression in *hos9-1*, genes with higher expression in *hos9-1* by 3-fold but that are also cold-inducible**

| AGI ID    | Gene Title                                                     | <i>hos9-1</i> vs_ C24_0C-24H_Signal Log Ratio | C24-0C-24H_Signal | C24-0C-24H_Detection | <i>hos9-1</i> _0C-24H_Signal | <i>hos9-1</i> _0C-24H_Detection |
|-----------|----------------------------------------------------------------|-----------------------------------------------|-------------------|----------------------|------------------------------|---------------------------------|
| At5g51190 | AP2 domain transcription factor, putative                      | 3.5                                           | 89.7              | P                    | 899.4                        | P                               |
| At3g55840 | nematode resistance protein-related protein                    | 3.1                                           | 242.3             | P                    | 2235.7                       | P                               |
| At1g15010 | expressed protein                                              | 2.7                                           | 242.4             | P                    | 1691.8                       | P                               |
| At4g24570 | mitochondrial carrier protein family                           | 2.7                                           | 631.6             | P                    | 4457.9                       | P                               |
| At3g55980 | expressed protein                                              | 2.7                                           | 569.8             | P                    | 3893.9                       | P                               |
| At5g54490 | calcium-binding protein, putative                              | 2.7                                           | 585               | P                    | 4119.6                       | P                               |
| At5g64870 | nodulin-related                                                | 2.7                                           | 161.1             | P                    | 993.2                        | P                               |
| At2g46400 | WRKY family transcription factor                               | 2.6                                           | 892.4             | P                    | 4361.3                       | P                               |
| At4g17490 | ethylene responsive element binding factor (ERF6)              | 2.6                                           | 65.2              | A                    | 461.7                        | P                               |
| At1g28370 | ethylene responsive element binding factor 11, (EREBP11/ERF11) | 2.5                                           | 365.6             | P                    | 2024.4                       | P                               |
| At1g61340 | F-box protein family                                           | 2.4                                           | 363.3             | A                    | 2327.3                       | P                               |
| At5g26920 | calmodulin-binding protein                                     | 2.4                                           | 1241.8            | P                    | 6901.1                       | P                               |
| At2g35710 | glycogenin glucosyltransferase (glycogenin) - related          | 2.3                                           | 162               | P                    | 1079.8                       | P                               |
| At3g10930 | expressed protein                                              | 2.3                                           | 130.8             | P                    | 611                          | P                               |
| At3g50930 | AAA-type ATPase family                                         | 2.3                                           | 1016.2            | P                    | 5180.2                       | P                               |
| At5g42380 | calmodulin-related protein, putative                           | 2.3                                           | 468.2             | P                    | 1878.4                       | P                               |
| At5g45630 | hypothetical protein                                           | 2.3                                           | 108.5             | P                    | 490.8                        | P                               |
| At3g22910 | calcium-transporting ATPase (calcium pump), putative           | 2.2                                           | 1152.9            | P                    | 5720.2                       | P                               |
| At4g29780 | expressed protein                                              | 2.1                                           | 518.2             | P                    | 2529.9                       | P                               |
| At4g39670 | expressed protein                                              | 2.1                                           | 900.3             | P                    | 4211.8                       | P                               |
| At1g21110 | O-methyltransferase 1, putative                                | 2                                             | 111.4             | P                    | 461.7                        | P                               |
| At2g38470 | WRKY family transcription factor                               | 1.9                                           | 1705.4            | P                    | 6281.5                       | P                               |
| At2g30020 | protein phosphatase 2C (PP2C), putative                        | 1.9                                           | 165.5             | P                    | 587.6                        | P                               |
| At1g76650 | calcium-binding EF-hand family protein                         | 1.9                                           | 154.3             | P                    | 562.4                        | P                               |
| At3g02840 | expressed protein                                              | 1.9                                           | 164               | P                    | 788.6                        | P                               |
| At4g27280 | calcium-binding EF-hand family protein                         | 1.9                                           | 3174.7            | P                    | 11729                        | P                               |
| At3g44260 | CCR4-associated factor 1-related protein                       | 1.9                                           | 138.9             | P                    | 510.5                        | P                               |
| At3g61190 | BON1-associated protein 1 (BAP1)                               | 1.9                                           | 1221.4            | P                    | 5343.4                       | P                               |
| At3g56880 | expressed protein                                              | 1.9                                           | 2060.1            | P                    | 7606.7                       | P                               |
| At2g32190 | expressed protein                                              | 1.8                                           | 1051.7            | P                    | 3317.8                       | P                               |
| At1g72520 | lipoygenase (LOX), putative                                    | 1.8                                           | 301.6             | P                    | 1055.6                       | P                               |
| At5g47230 | ethylene responsive element binding factor 5 (AtERF5)          | 1.8                                           | 272.1             | P                    | 801                          | P                               |
| At2g32210 | expressed protein                                              | 1.7                                           | 2023              | P                    | 6492.9                       | P                               |
| At1g80840 | WRKY family transcription factor                               | 1.7                                           | 683.5             | P                    | 2490.8                       | P                               |

|           |                               |     |        |   |        |   |
|-----------|-------------------------------|-----|--------|---|--------|---|
| At2g41640 | expressed protein             | 1.7 | 433.9  | P | 1227.3 | P |
| At2g41010 | expressed protein             | 1.6 | 247.9  | P | 798.8  | P |
| At1g19020 | expressed protein             | 1.6 | 2219.9 | P | 6687.5 | P |
| At3g28340 | galactinol synthase, putative | 1.6 | 829.5  | P | 2879.7 | P |
| At3g52400 | syntaxin of plants SYP122     | 1.6 | 1212.9 | P | 3891.1 | P |
| At5g10695 | expressed protein             | 1.6 | 1242.9 | P | 3316.3 | P |
| At1g73540 | MutT/nudix family protein     | 1.6 | 196.2  | P | 819.3  | P |
